# Supplementary material for: Preferential zinc sputtering during the growth of aluminum doped zinc oxide thin films by radio frequency magnetron sputtering
Source: Royal Society of Chemistry journal article supplement (doi:10.1039/d2tc02180c), 2022-01-01
Supplement: d2tc02180c1.pdf [file d2tc02180c1.pdf]

## Supplementary information

### Preferential Zinc Sputtering During Growth of Aluminum Doped Zinc Oxide Thin Films by Radio Frequency Magnetron Sputtering

Kion Norrman, Poul Norby and Eugen Stamate

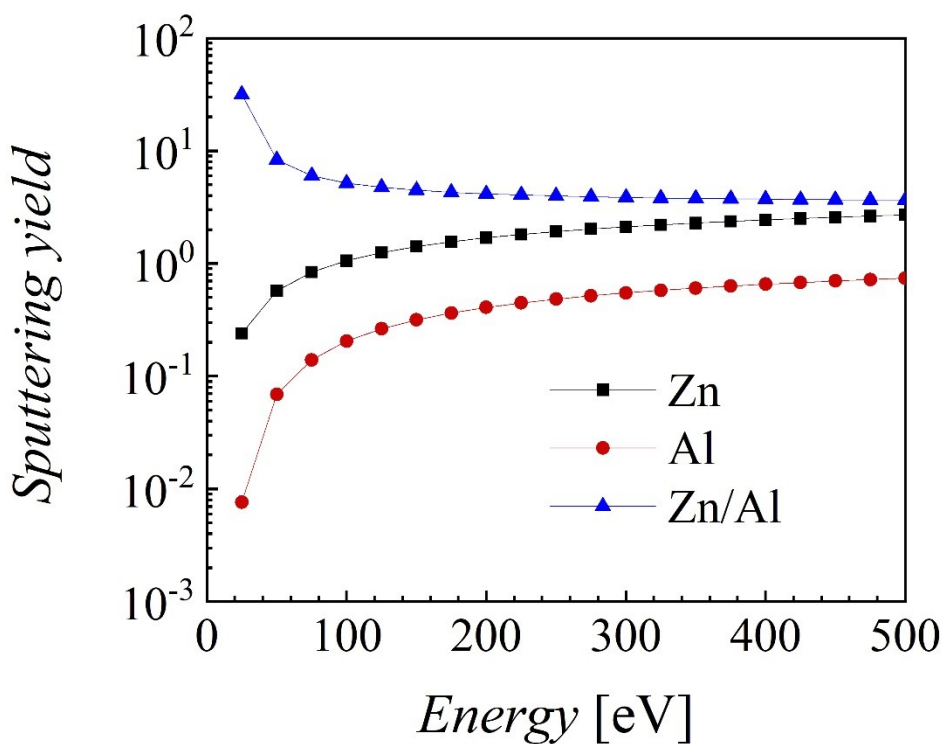

**Fig. S1** Sputtering yield on Zn and Al targets (including the Zn/Al ratio) as a function of incident oxygen ion energy.

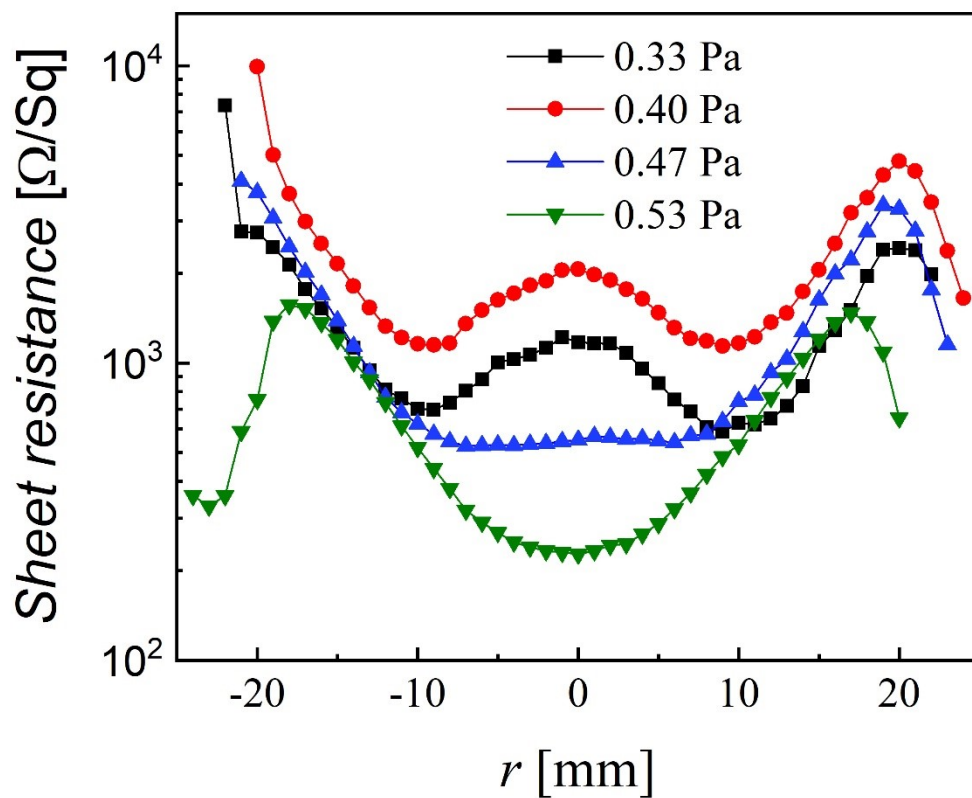

**Fig. S2** Spatial distribution of the sheet resistance for different deposition pressures measured for 10x50 mm<sup>2</sup> samples. The 50x50 mm<sup>2</sup> samples deposited under similar conditions have been used to measure the 2D XRD profiles presented in Fig. 6.
